# Supplementary material
Source: PubMed Central journal article supplement (PMC10167917)
Supplement: NIHMS1885910-supplement-Supplemental_information.pdf [file NIHMS1885910-supplement-Supplemental_information.pdf]

**Supplemental information**

**Regulatory T cell differentiation is controlled  
by  $\alpha$ KG-induced alterations in mitochondrial  
metabolism and lipid homeostasis**

**Maria I. Matias, Carmen S. Yong, Amir Foroushani, Chloe Goldsmith, Cédric Mongellaz, Erdinc Sezgin, Kandice R. Levental, Ali Talebi, Julie Perrault, Anais Rivière, Jonas Dehairs, Océane Delos, Justine Bertand-Michel, Jean-Charles Portais, Madeline Wong, Julien C. Marie, Ameeta Kelekar, Sandrina Kinet, Valérie S. Zimmermann, Ilya Levental, Laurent Yvan-Charvet, Johannes V. Swinnen, Stefan A. Muljo, Hector Hernandez-Vargas, Saverio Tardito, Naomi Taylor, and Valérie Dardalhon**

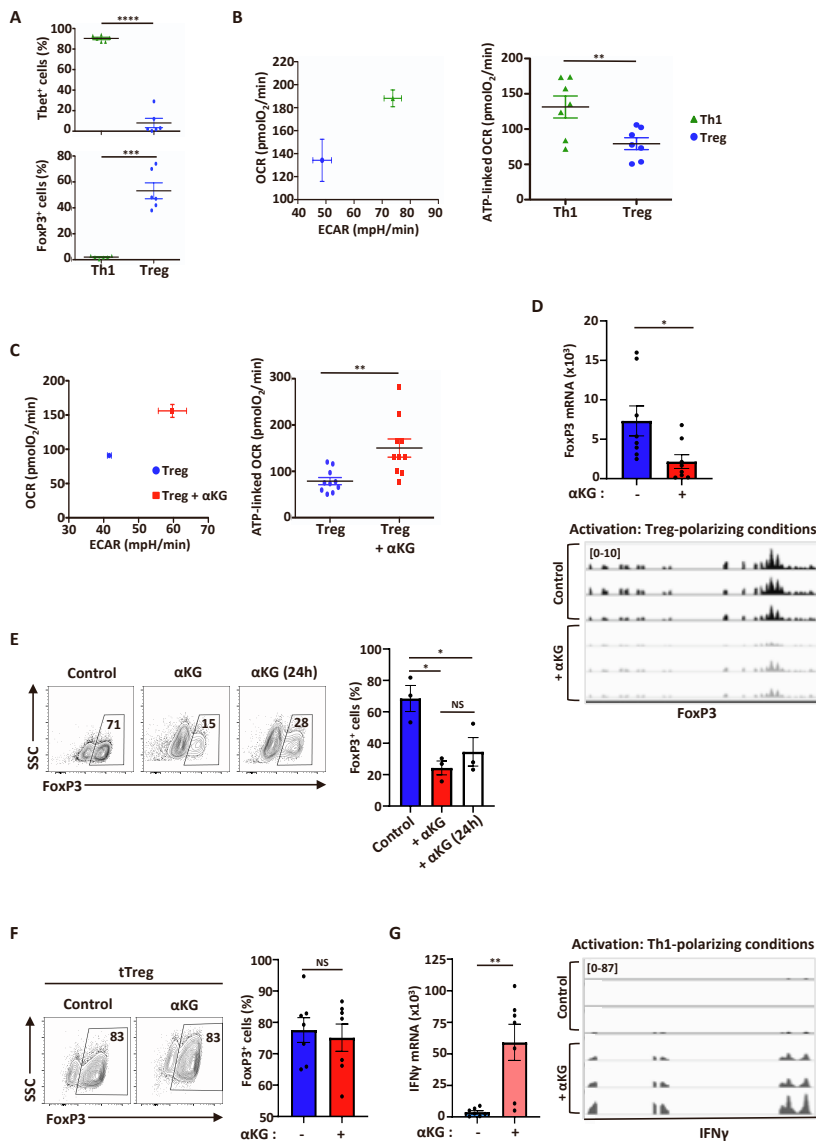

**Figure S1. Treg polarization is attenuated by αKG.** Related to Figure 1.

(A) The polarization of naïve CD4 T cells stimulated under Th1- and Treg-polarizing conditions was evaluated as a function of Tbet and FoxP3 expression, respectively. The percentages of Tbet<sup>+</sup> and FoxP3<sup>+</sup> cells were monitored by intracellular staining and individual data points from 6 independent experiments are presented. Means ± SEM are presented by horizontal lines (left panels). (B) Energy plots (left) of basal OCR and extracellular acidification rate (ECAR) as well as ATP-linked respiration (right, n=7 independent experiments, means ± SEM) are presented. (C) Naïve CD4 T cells were stimulated under Treg-polarizing conditions in the absence (control) or presence of αKG and OCR/ECAR energy plots (left) as well as ATP-linked OCR (right) are presented (n=10 independent experiments, means ± SEM). (D) *Foxp3* mRNA levels ± SEM were evaluated by qRT-PCR and normalized to *HPRT* (left, n=8). RNAseq read densities of the *Foxp3* gene were evaluated (n=2 independent experiments with technical triplicates). (E) αKG was added to naïve CD4 T cells stimulated under Treg-polarizing conditions at time 0 or at 24h. The percentages of FoxP3<sup>+</sup> cells were evaluated at day 4 and representative dot plots (left) as well as a quantification of the means ± SEM of 3 independent experiments are shown (right). (F) FoxP3<sup>+</sup>GFP<sup>+</sup> thymic Tregs (tTregs) were activated in the indicated conditions. At day 4, the percentages of FoxP3<sup>+</sup> cells were evaluated (left) and quantification of means ± SEM are presented (right, n=7). (G) Naïve CD4 T cells were stimulated under Th1-polarizing conditions and *Ifng* mRNA levels were assessed by qRT-PCR at day 4 of Th1 polarization (left panel, n=7). Genome browser shots of RNA-seq reads over the *Ifng* gene are shown with the range of reads per million (RPM) presented on the y axis (n=2 independent experiments with technical triplicates, right panel). Statistical differences were determined by a paired (panels A, B, C) or unpaired (panels D, F, G) 2-tailed t test (panels A, B, C), or a one-way ANOVA and Tukey multiple comparison test (panel E). \*, p<0.05; \*\*, p<0.01; \*\*\*, p<0.001; \*\*\*\*, p<0.0001; NS, not significant

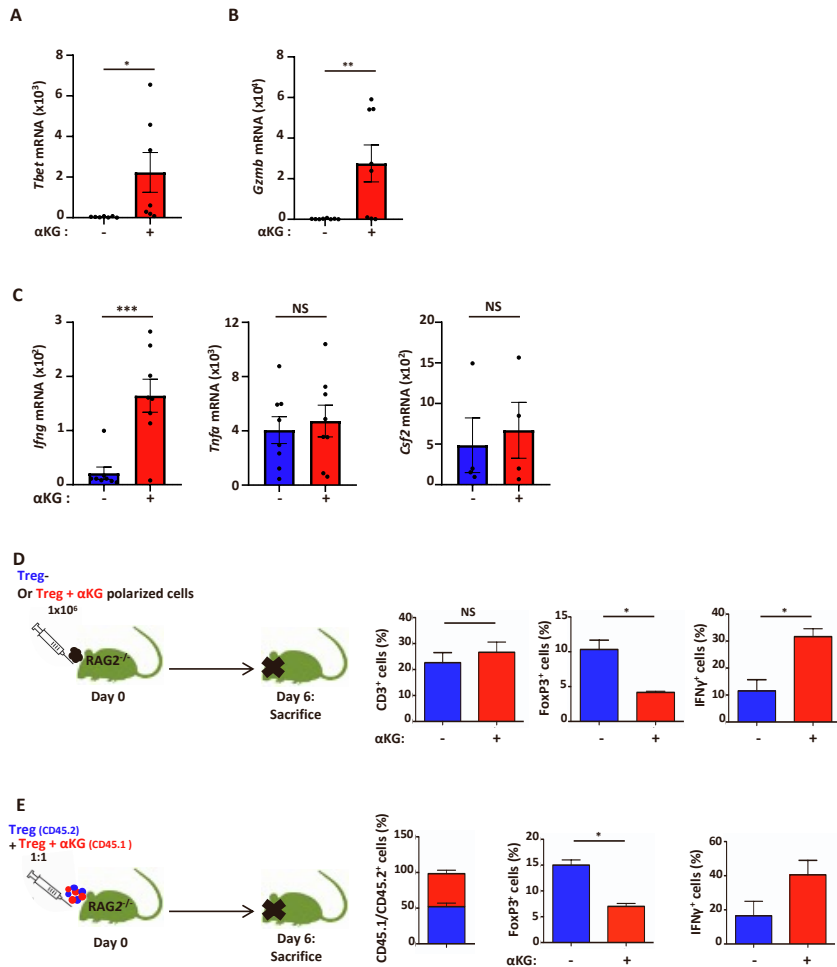

**Figure S2. The altered potential of CD4 T cells polarized in the presence of  $\alpha$ KG persists following adoptive transfer.** Related to Figure 2.

(A) Following polarization of CD4 T cells under Treg conditions in the presence or absence of  $\alpha$ KG (day 4), *Tbet* transcripts were quantified by qRT-PCR and normalized to *Hprt*. (n=7). (B) Granzyme B (*Gzmb*) transcripts were quantified by qRT-PCR and normalized to *Hprt* (n=7). (C) mRNA levels for *Ifng* (n=8), *Tnfa* (n=8) and *Csf2* (GM-CSF, n=4) were assessed by qRT-PCR and normalized to *Hprt*. (D) RAG2<sup>-/-</sup> mice were adoptively transferred with CD4 T cells polarized in Treg conditions in the absence or presence of  $\alpha$ KG (1e6) and mice were sacrificed at day 6 (schematic on the left). The percentages of CD3<sup>+</sup> T cells, FoxP3<sup>+</sup> T cells and IFN $\gamma$ <sup>+</sup> T cells were evaluated by flow cytometry and means  $\pm$  SEM are presented (n=3, right panels). (E) Mice were subjected to a competitive transfer of 0.5e6 CD4 T cell polarized in the absence (CD45.2) or presence of  $\alpha$ KG (CD45.1) and evaluated at day 6 (schematic on the left). The percentages of CD45.1 and CD45.2 T cells as well as the percentages of FoxP3<sup>+</sup> and IFN $\gamma$ <sup>+</sup> T cells are presented (n=3 and n=2 for FoxP3 and IFN $\gamma$  respectively, means  $\pm$  SEM, right panels). Each point in panels A-C represents an independent experiment with means  $\pm$  SEM presented. Statistical differences were determined by an unpaired (panels A-C) or paired (panels D, E) 2-tailed t test. \*, p<0.05; \*\*, p<0.01; \*\*\*, p<0.001; NS, not significant

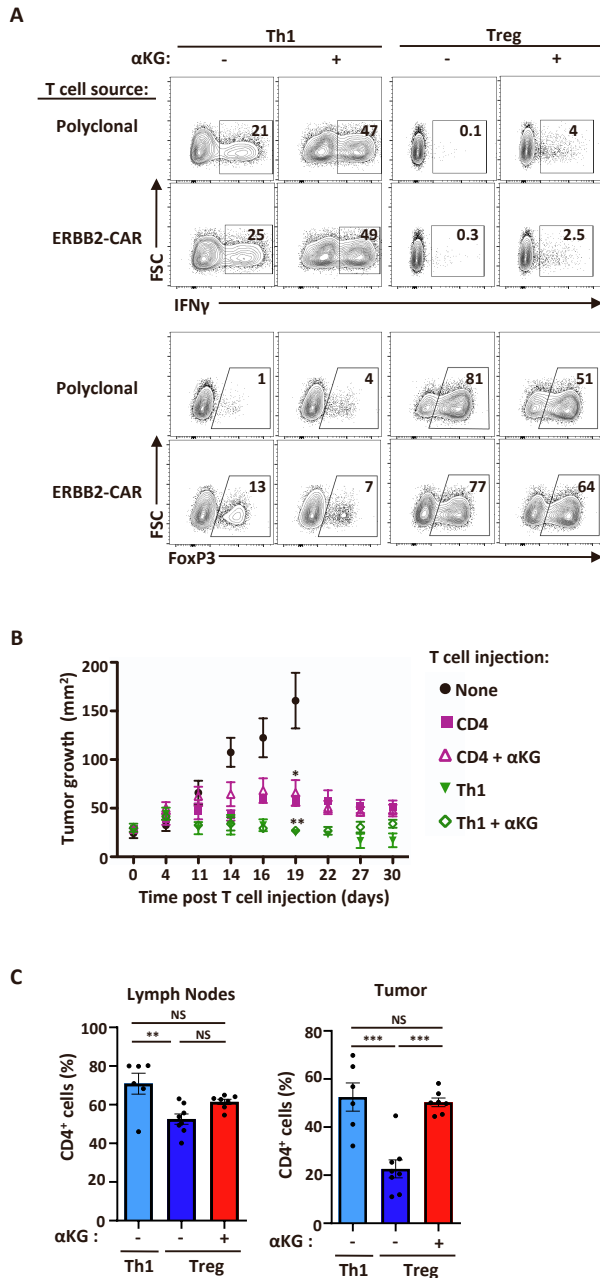

**Figure S3. ERBB2-CAR T cells attenuate the growth of ERBB2<sup>+</sup>24JK fibrosarcoma.** Related to Figure 3.

**(A)** The potential of transgenic ERBB2-CAR T cells, as compared to polyclonal T cells, to be polarized to a Th1 or Treg fate was compared in the absence or presence of  $\alpha$ KG. IFN $\gamma$  production was evaluated at day 4 of stimulation in the indicated conditions and representative plots are shown (top plots). The induction of FoxP3 expression was also evaluated at day 4 and the percentages of FoxP3<sup>+</sup> cells are indicated (bottom plots). **(B)** ERBB2-CAR CD4 T cells were activated for 5 days in neutral or Th1-polarizing conditions in the absence or presence of  $\alpha$ KG. They were adoptively transferred into RAG2<sup>-/-</sup> mice (3e6) that had been subcutaneously injected with ERBB2<sup>+</sup>24JK fibrosarcoma 7 days earlier. Tumor volume was measured at the indicated time points. Mean tumor area  $\pm$  SEM is presented from days 0 to 30 (n=4 mice per group) and statistical differences were evaluated at day 19. **(C)** Quantification  $\pm$  SEM of CD4 T cells in LN (left) and tumor (right) were monitored with each point representing data from an individual mouse (n=6-8 per group). Statistical differences were determined by a one-way ANOVA and Tukey test for multiple comparisons. \*, p<0.05; \*\*, p<0.01; \*\*\*, p<0.001; \*\*\*\*, p<0.0001; NS, not significant

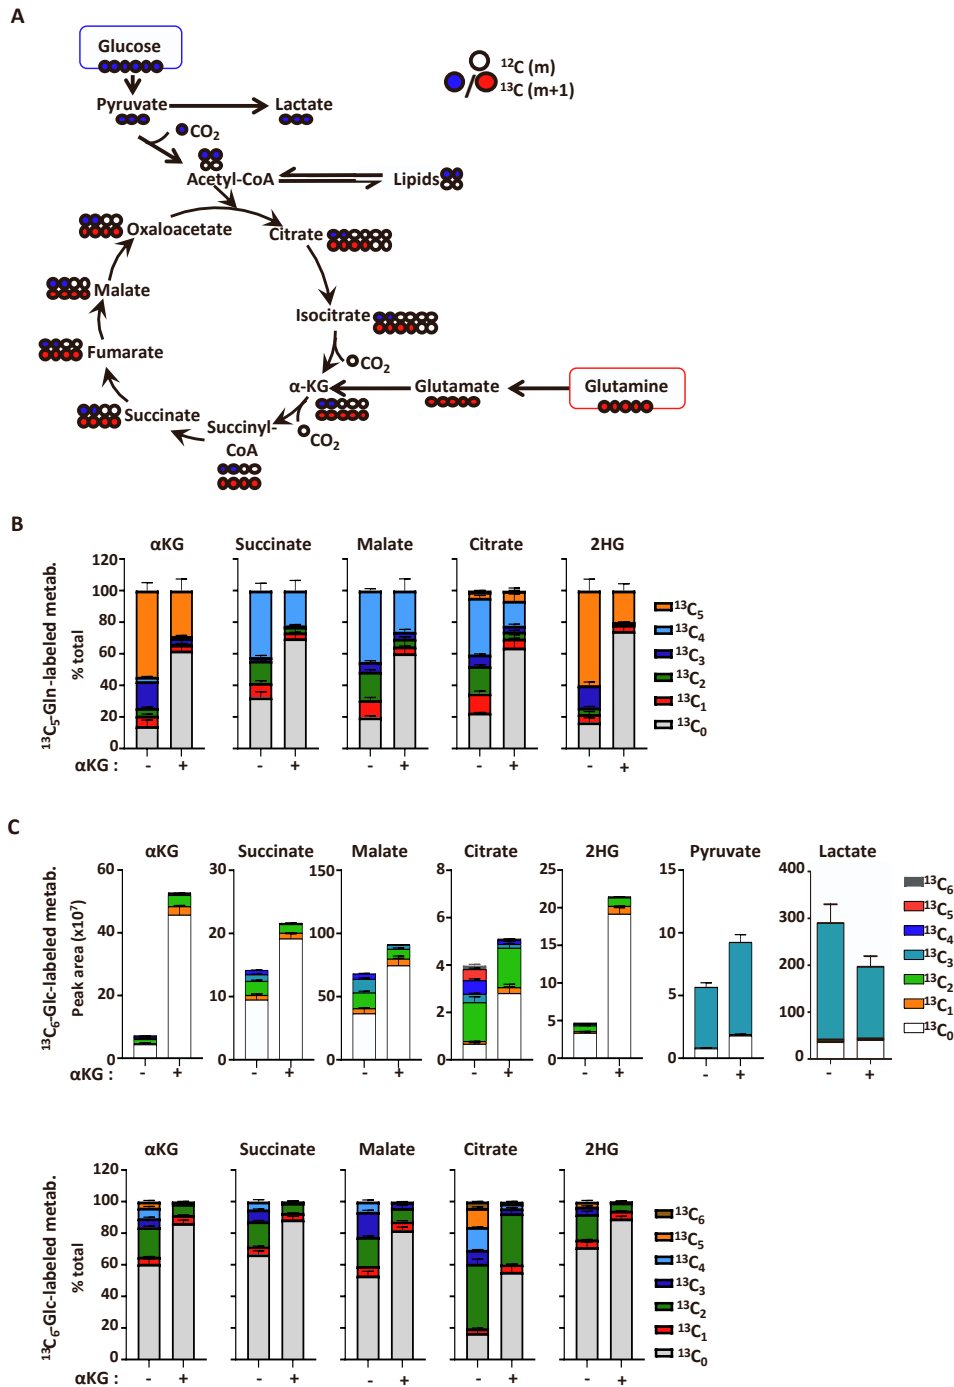

**Figure S4. Utilization of glucose carbons for the generation of TCA cycle intermediates is decreased in the presence of  $\alpha$ KG.** Related to Figure 5.

**(A)** Schematic representation of  $^{13}\text{C}$  labeling in TCA cycle intermediates generated from  $[^{13}\text{C}_6]$ glucose and  $[^{13}\text{C}_5]$ glutamine. **(B)** The mean fractional abundance of the different isotopologues from  $[^{13}\text{C}_5]$ glutamine into TCA cycle intermediates are shown as a percentage of the total. **(C)** The peak area of each metabolite and percentage incorporation of the carbon isotopologues from  $[^{13}\text{C}_6]$ glucose (top graphs) as well as the mean fractional abundance of the different isotopologues as a percentage of the total (bottom graphs) are shown. Quantifications are presented as means  $\pm$  SEM ( $n=2$  independent experiments, technical triplicates).

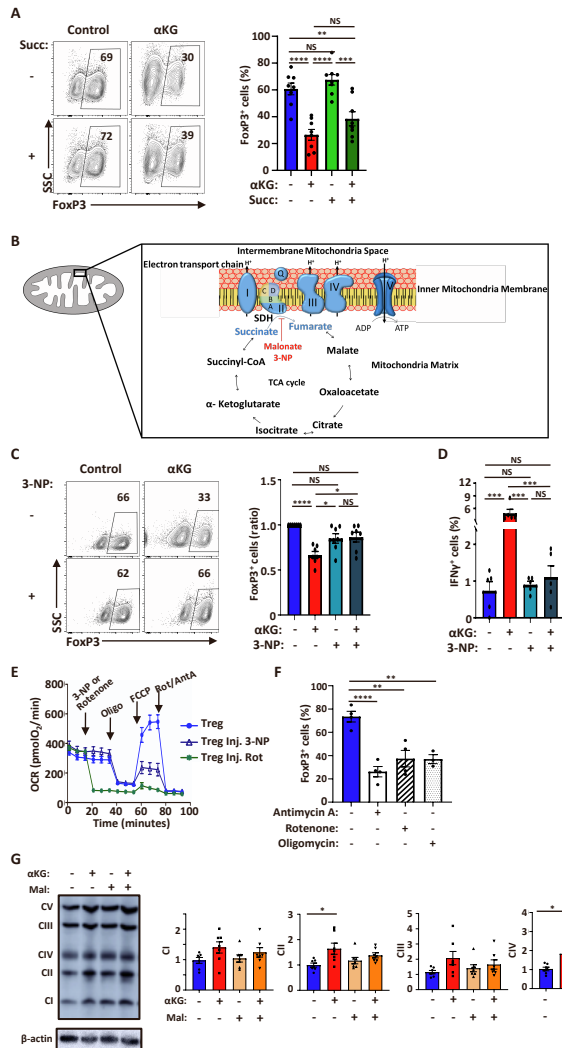

**Figure S5. Inhibition of Complex II inhibits the  $\alpha$  KG-mediated attenuation of Treg differentiation.** Related to Figure 5.

**(A)** Naïve CD4 T cells were stimulated in Treg polarization conditions in the absence or presence of  $\alpha$ KG and succinate as indicated (3.5 mM). The percentages of FoxP3<sup>+</sup> cells were evaluated at day 4 by intracellular staining and representative plots are shown (left). Quantification of FoxP3 levels is presented as means  $\pm$  SEM of 7 independent experiments. **(B)** Schematic representation showing the role of the succinate dehydrogenase (SDH) enzyme in both the TCA cycle and the electron transport chain. Inhibitors (Malonate, 3-NP) of mitochondrial complex II (SDH) are indicated. **(C)** The impact of 3-NP (62.5 $\mu$ M) on Treg polarization was evaluated and representative FoxP3 plots (left) as well as the normalized ratio  $\pm$  SEM of FoxP3<sup>+</sup> cells is presented (n=7, right). **(D)** The percentages of IFN $\gamma$ <sup>+</sup> cells in the different conditions are presented (n=5, means  $\pm$  SEM). **(E)** At day 4 of polarization under Treg conditions, oxygen consumption was monitored following injection (inj.) of 3-NP (62.5 $\mu$ M) or rotenone (100nM) directly into the Seahorse analyzer. OCR is also presented following injection of oligomycin, FCCP, and rotenone/antimycin A as indicated. Data are means of 4-6 replicates and are representative of 1 of 2 independent experiments. **(F)** The mean percentages  $\pm$  SEM of FoxP3<sup>+</sup> cells differentiating in the presence of antimycin A (250nM), rotenone (25nM), and oligomycin (250nM, added at day 1) relative to control conditions are presented (n=3-4 independent experiments, day 4 of polarization). **(G)** Levels of mitochondrial complexes I-V were monitored using an antibody cocktail and representative levels together with an actin loading control are presented (left). Quantification of levels in 7 independent experiments was determined relative to actin and means  $\pm$ SEM are presented. Significance was determined either by unpaired 2-tailed test (panels A and B) or by a one-way ANOVA and Tukey multiple comparison test (panels C-G). \*, p<0.05; \*\*, p<0.01; \*\*\*, p<0.001; \*\*\*\*, p<0.0001; NS, not significant)

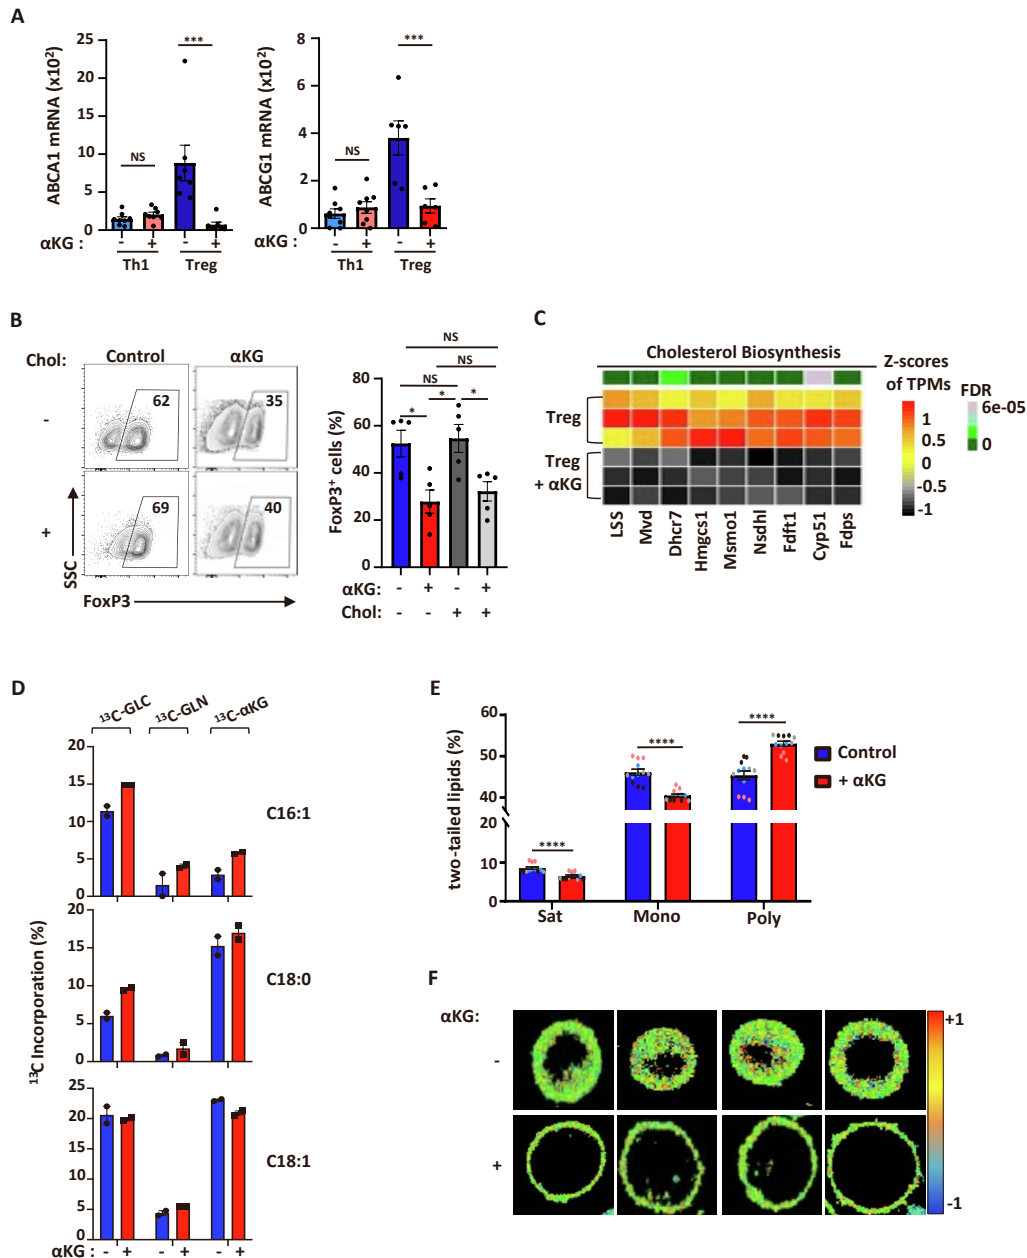

**Figure S6. Decreased  $\alpha$ KG-induced transcription of cholesterol-biosynthesis genes does not regulate Treg polarization.** Related to Figure 6.

(A) *Abca1* and *Abcg1* transcripts were assessed by qRT-PCR and normalized to *HPRT*. Data are presented as means  $\pm$  SEM of technical triplicates from 8 independent experiments. (B) Naïve CD4 T cells were activated in Treg polarizing conditions in the absence or presence of  $\alpha$ KG and/or water-soluble cholesterol (50mM). The percentages of FoxP3<sup>+</sup> cells were evaluated on day 4 by intracellular staining and representative dot plots are presented (left) as well as a quantification of the means  $\pm$ SEM of 5 independent experiments (right). (C) A heatmap of RNASeq data showing scaled expression (Z-scores of TPM transformed count data) for cholesterol biosynthesis genes in T cells activated in Treg-polarizing conditions in the absence or presence of  $\alpha$ KG. Each row represents an independent sample. Statistical significance is indicated in the top bar. (D) The percent incorporation  $\pm$  SEM of carbon isotopologues from [<sup>13</sup>C<sub>6</sub>]glucose, [<sup>13</sup>C<sub>5</sub>]glutamine, and [<sup>13</sup>C<sub>5</sub>]dimethyl- $\alpha$ KG into C16:1, C18:0, and C18:1 FAs is shown following Treg polarization in the presence or absence of  $\alpha$ KG (n=2 technical replicates). (E) The level of unsaturation in membrane phospholipids (Sat, Saturated; Mono, Monounsaturated; Poly, Polyunsaturated) is presented as means  $\pm$  SEM. (F) Representative C-Laurdan spectral microscopy evaluating packing of membranes as a function of the red shift in loosely packed membranes (means  $\pm$  SEM). Significance was determined by unpaired 2-tailed test \*, p<0.05; \*\*\*, p<0.001; \*\*\*\*, p<0.0001; NS, not significant)

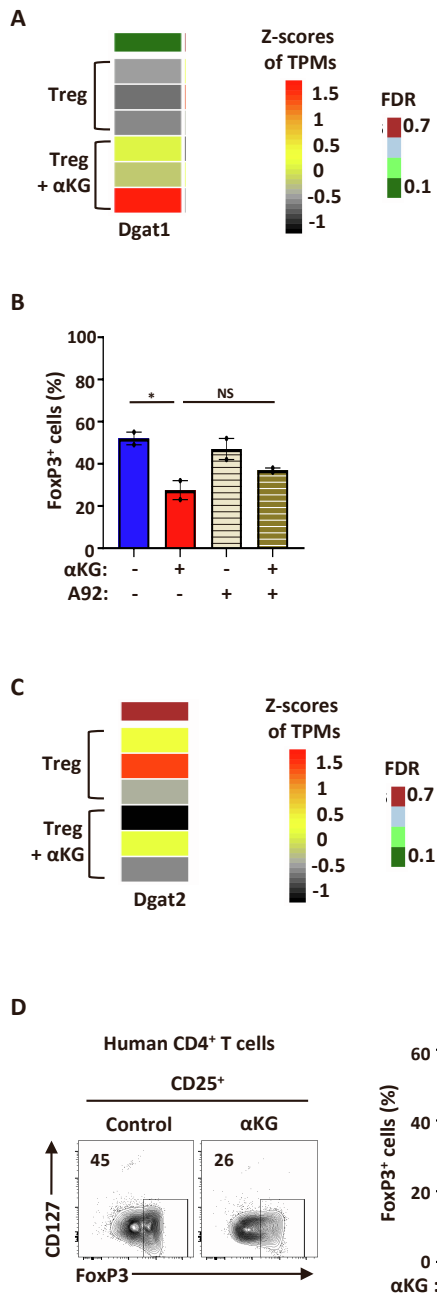

**Figure S7. Inhibition of DGAT1 does not rescue Treg differentiation in the presence of  $\alpha$ KG.** Related to Figure 7.

(A) A heatmap of RNASeq data showing scaled expression (Z-scores of TPM transformed count data) for *Dgat1* in T cells activated in Treg-polarizing conditions in the absence or presence of  $\alpha$ KG. Each row represents an independent sample and statistical significance is indicated in the top bar. (B) The impact of the DGAT1 inhibitor A-925200 (40 $\mu$ M) on Treg polarization was evaluated and the percentages of FoxP3<sup>+</sup> cells  $\pm$  SEM are presented at day 4 (n=2). Statistical difference was determined by a one-way ANOVA and Tukey test for multiple comparisons (\*, p<0.05; NS, not significant). (C) A heatmap of *Dgat2* RNASeq data is presented as for panel A. (D) Naïve human CD4<sup>+</sup> T cells were activated in Treg-polarizing conditions and at day 4 of stimulation, Treg polarization was evaluated as a function of intracellular FoxP3 staining in gated CD25<sup>+</sup>CD127<sup>low</sup> cells (left). Quantification  $\pm$  SEM of the percentages of FoxP3<sup>+</sup> cells is shown for 12 healthy donors (12 independent experiments) and significance was determined by an unpaired t-test. \*\*, p=0.003



**Supplemental Table 5. Genes upregulated in enriched pathways following polarization in Treg conditions in the presence of  $\alpha$ KG. Related to Figure 4.**

| <i>Mitochondrial RNA metabolic process</i> | <i>Ribonucleoprotein complex biogenesis</i> | <i>Mitochondrial gene expression</i> | <i>ncRNA metabolic process</i> | <i>RNA modification</i> |         |         |
|--------------------------------------------|---------------------------------------------|--------------------------------------|--------------------------------|-------------------------|---------|---------|
| Aars2                                      | Aatf                                        | Nop58                                | Aars2                          | Aatf                    | Nsun5   | Aars2   |
| Elac2                                      | Abce1                                       | Npm1                                 | Elac2                          | Abce1                   | Nufip1  | Ctu2    |
| Fastkd1                                    | Bop1                                        | Npm3                                 | Fastkd2                        | Bop1                    | Pa2g4   | Dimt1   |
| Fastkd5                                    | Brix1                                       | Nsun5                                | Fastkd5                        | Brix1                   | Pdcd11  | Dkc1    |
| Lrpprc                                     | Bysl                                        | Nufip1                               | Gfm1                           | Bysl                    | Ppan    | Elp1    |
| Mrpl12                                     | Dcaf13                                      | Pa2g4                                | Lrpprc                         | Dcaf13                  | Prmt5   | Ftsj3   |
| Polrmt                                     | Ddx21                                       | Pdcd11                               | Mrpl12                         | Ddx21                   | Pwp2    | Mettl1  |
| Ppargc1b                                   | Ddx27                                       | Ppan                                 | Mrpl47                         | Ddx27                   | Rcl1    | Mettl16 |
| Slc25a33                                   | Ddx51                                       | Prmt5                                | Mrps18b                        | Ddx51                   | Rpl71i  | Mrm1    |
| Supv31l                                    | Ddx56                                       | Pwp2                                 | Mrps34                         | Ddx56                   | Rps27l  | Nat10   |
| Tbrg4                                      | Denr                                        | Rcl1                                 | Polrmt                         | Denr                    | Rrn3    | Nhp2    |
| Trnt1                                      | Dhx30                                       | Rpl71l                               | Ppargc1b                       | Dhx30                   | Rrp15   | Nsun2   |
| Twnk                                       | Dhx37                                       | Rps27l                               | Qrs1                           | Dhx37                   | Rrp1b   | Nsun5   |
| Yars2                                      | Dimt1                                       | Rrn3                                 | Slc25a33                       | Dimt1                   | Rrp7a   | Pus1    |
|                                            | Dkc1                                        | Rrp15                                | Supv31l                        | Dkc1                    | Rrp8    | Pus7    |
|                                            | Ebna1b                                      | Rrp1b                                | Tbrg4                          | Ebna1bp2                | Rrp9    | Pus7l   |
|                                            | Eif3g                                       | Rrp7a                                | Trnt1                          | Eif3g                   | Rrs1    | Pusl1   |
|                                            | Eif6                                        | Rrp8                                 | Trub2                          | Eif6                    | Rsl24d1 | Rpsud2  |
|                                            | Exosc1                                      | Rrp9                                 | Twnk                           | Exosc1                  | Sdad1   | Thg1l   |
|                                            | Exosc0                                      | Rrs1                                 | Uqcc2                          | Exosc10                 | Srfbp1  | Thumpd1 |
|                                            | Fastkd2                                     | Rsl1d1                               | Yars2                          | Fastkd2                 | Surf6   | Trmt1   |
|                                            | Fcf1                                        | Rsl24d1                              |                                | Fcf1                    | Tarbp2  | Trmt6   |
|                                            | Ftsj3                                       | Sdad1                                |                                | Ftsj3                   | Tbl3    | Trmt61a |
|                                            | Gemin4                                      | Srfbp1                               |                                | Gemin4                  | Tsr1    | Trub2   |
|                                            | Gemin5                                      | Surf6                                |                                | Gemin5                  | Urb1    |         |
|                                            | Gnl2                                        | Tarbp2                               |                                | Gnl2                    | Urb2    |         |
|                                            | Gtpbp4                                      | Tbl3                                 |                                | Gtpbp4                  | Usp36   |         |
|                                            | Heatr1                                      | Tsr1                                 |                                | Heatr1                  | Utp14a  |         |
|                                            | Heatr3                                      | Urb1                                 |                                | Heatr3                  | Wdr12   |         |
|                                            | Hsp90aa1                                    | Urb2                                 |                                | Hsp90aa1                | Wdr18   |         |
|                                            | Imp4                                        | Usp36                                |                                | Imp4                    | Wdr43   |         |
|                                            | Ipo4                                        | Utp14a                               |                                | Ipo4                    | Wdr46   |         |
|                                            | Lyar                                        | Wdr12                                |                                | Lyar                    | Wdr74   |         |
|                                            | Mdn1                                        | Wdr18                                |                                | Mphosph10               | Wdr75   |         |
|                                            | Mettl16                                     | Wdr43                                |                                | Mrm1                    | Zfp593  |         |
|                                            | Mphosph10                                   | Wdr46                                |                                | Mrpl11                  | Znhit3  |         |
|                                            | Mrm1                                        | Wdr55                                |                                | Mrto4                   | Znhit6  |         |
|                                            | Mrpl11                                      | Wdr74                                |                                | Mybbp1a                 |         |         |
|                                            | Mrto4                                       | Wdr75                                |                                | Nat10                   |         |         |
|                                            | Mybbp1a                                     | Zfp593                               |                                | Ncl                     |         |         |
|                                            | Nat10                                       | Znhit3                               |                                | Nhp2                    |         |         |
|                                            | Ncl                                         | Znhit6                               |                                | Nip7                    |         |         |
|                                            | Nhp2                                        |                                      |                                | Nle1                    |         |         |
|                                            | Nip7                                        |                                      |                                | Nob1                    |         |         |
|                                            | Nle1                                        |                                      |                                | Noc4l                   |         |         |
|                                            | Nob1                                        |                                      |                                | Nol10                   |         |         |
|                                            | Noc4l                                       |                                      |                                | Nol6                    |         |         |
|                                            | Nol10                                       |                                      |                                | Nol9                    |         |         |
|                                            | Nol6                                        |                                      |                                | Nop14                   |         |         |
|                                            | Nol8                                        |                                      |                                | Nop16                   |         |         |
|                                            | Nol9                                        |                                      |                                | Nop56                   |         |         |
|                                            | Nop14                                       |                                      |                                | Nop58                   |         |         |
|                                            | Nop16                                       |                                      |                                | Npm1                    |         |         |
|                                            | Nop56                                       |                                      |                                | Npm3                    |         |         |

**Supplemental Table 6. Genes downregulated in enriched pathways following polarization in Treg conditions in the presence of  $\alpha$ KG. Related to Figure 6.**

| <i>Cellular response to lipoprotein particle stimulus</i> | <i>Response to lipoprotein particle</i> | <i>Adaptive thermogenesis</i> | <i>Steroid metabolic process</i> | <i>Neg. regulation- intracellular signal transduction</i> |
|-----------------------------------------------------------|-----------------------------------------|-------------------------------|----------------------------------|-----------------------------------------------------------|
| Abca1                                                     | Abca1                                   | Ache                          | Abca1                            | Arhgap12                                                  |
| Abcg1                                                     | Cd81                                    | Arntl                         | Abcg1                            | Arntl                                                     |
| Cd81                                                      | Hmgcs1                                  | Arrdc3                        | Adm                              | Arrdc3                                                    |
| Hmgcs1                                                    | Itgb1                                   | Ddit3                         | Aplp2                            | Bcl6                                                      |
| Itgb1                                                     | Ldlr                                    | Elovl6                        | Cat                              | Ccn3                                                      |
| Ldlr                                                      | Pparg                                   | Epas1                         | Cyp51                            | Cgnl1                                                     |
| Pparg                                                     | Srebf2                                  | Grb10                         | Dab2                             | Cpne1                                                     |
| Srebf2                                                    | Syk                                     | Igf1r                         | Dhcr7                            | Dab2                                                      |
| Syk                                                       |                                         | Il18r1                        | Esr1                             | Dab2ip                                                    |
|                                                           |                                         | Ip6k1                         | Fdft1                            | Ddit3                                                     |
|                                                           |                                         | Lpin1                         | Fdps                             | Dhx58                                                     |
|                                                           |                                         | Map2k6                        | Hmgcr                            | Dmd                                                       |
|                                                           |                                         | Ogt                           | Hmgcs1                           | Dusp1                                                     |
|                                                           |                                         | Oxtr                          | Hsd17b7                          | Dusp6                                                     |
|                                                           |                                         | Plcl1                         | Igf1r                            | Epm2a                                                     |
|                                                           |                                         | Pparg                         | Igfbp7                           | Esr1                                                      |
|                                                           |                                         | Prlr                          | Insig1                           | G2e3                                                      |
|                                                           |                                         | Scd1                          | Ldlr                             | Hdac7                                                     |
|                                                           |                                         | Syk                           | Ldlrap1                          | Herpud1                                                   |
|                                                           |                                         | Vegfa                         | Lss                              | Hmgcr                                                     |
|                                                           |                                         | Zfp516                        | Msmo1                            | Igf1r                                                     |
|                                                           |                                         |                               | Mvd                              | Inpp5k                                                    |
|                                                           |                                         |                               | Mvk                              | Itgb1                                                     |
|                                                           |                                         |                               | Nsdhl                            | Klf4                                                      |
|                                                           |                                         |                               | Plekha1                          | Mcl1                                                      |
|                                                           |                                         |                               | Pmvk                             | Myadm                                                     |
|                                                           |                                         |                               | Rora                             | P2rx7                                                     |
|                                                           |                                         |                               | Sc5d                             | Pde4b                                                     |
|                                                           |                                         |                               | Scd1                             | Phlpp1                                                    |
|                                                           |                                         |                               | Sqle                             | Pik3ip1                                                   |
|                                                           |                                         |                               | Srebf1                           | Pink1                                                     |
|                                                           |                                         |                               | Srebf2                           | Plekha1                                                   |
|                                                           |                                         |                               | Stard4                           | Pttg1ip                                                   |
|                                                           |                                         |                               | Tm7sf2                           | Rasa1                                                     |
|                                                           |                                         |                               |                                  | Rasa3                                                     |
|                                                           |                                         |                               |                                  | Rnf152                                                    |
|                                                           |                                         |                               |                                  | Rora                                                      |
|                                                           |                                         |                               |                                  | Rtkn2                                                     |
|                                                           |                                         |                               |                                  | Sh3bp4                                                    |
|                                                           |                                         |                               |                                  | Socs2                                                     |
|                                                           |                                         |                               |                                  | Spry1                                                     |
|                                                           |                                         |                               |                                  | Timp3                                                     |
|                                                           |                                         |                               |                                  | Ube2b                                                     |
|                                                           |                                         |                               |                                  | Ubr2                                                      |
|                                                           |                                         |                               |                                  | Wtip                                                      |

| <b>Supplementary Table 7. Cas9–crRNA Guides. Related to STAR Methods</b> |                 |   |                        |            |                        |                         |
|--------------------------------------------------------------------------|-----------------|---|------------------------|------------|------------------------|-------------------------|
| <b>Locus</b>                                                             | <b>Probe_ID</b> |   | <b>Sequence (mm10)</b> | <b>PAM</b> | <b>On-Target Score</b> | <b>Off-Target Score</b> |
| Itgb8                                                                    | itgb8_up_hh     | - | CGATTACCTCTATCCTACAA   | AGG        | 76                     | 84                      |
|                                                                          | itgb8_down_hh   | + | AGTGGAAGTGTCTGTACAA    | TGG        | 94                     | 54                      |
| Foxp3                                                                    | FoxP3_down 2.1  | - | ACGGTGGAATTGCTGCCTGA   | TGG        | 57                     | 68                      |
|                                                                          | FoxP3_down 2.2  | - | ATGGACTGCCCTGATAGATA   | GGG        | 62                     | 57                      |
| IL17a                                                                    | il17a_down      | - | TGTGGAACCTAAACACACGA   | GGG        | 82                     | 73                      |
|                                                                          | il17a_up        | + | CTAGCTTTACCAATTCCATA   | AGG        | 75                     | 46                      |
| Rorc                                                                     | rorc_down       | - | AAGACCTAACTACCTAGCAC   | AGG        | 85                     | 44                      |
|                                                                          | rorc_up         | + | GATAAGAGGACTGGGCACGT   | GGG        | 76                     | 71                      |
| Ifng                                                                     | ifng_up         | + | GCATCTGGGTCAAGATAACT   | GGG        | 75                     | 61                      |
|                                                                          | ifng_down       | - | CAATGCCTTTCCAAGGGTAT   | TGG        | 71                     | 50                      |
| Il10                                                                     | il10_up         | + | GACCTCACATAAGGTTCTTG   | AGG        | 74                     | 68                      |
|                                                                          | il10_down       | - | GCAAGCCTGACATTGACGTG   | CGG        | 64                     | 77                      |
| Maf                                                                      | Maf_up          | + | GGAAAGCTATCACACCTGTT   | TGG        | 78                     | 50                      |
|                                                                          | Maf_down        | - | CCATTTGAGCCTGACGTCAC   | GGG        | 77                     | 46                      |
| Il4                                                                      | IL-4_up         | + | GTTCTTGTTTCACAAGCCGC   | AGG        | 52                     | 72                      |
|                                                                          | IL-4_down       | - | GGGGCAATGAGTACCTCGAC   | AGG        | 73                     | 88                      |
| Gata3                                                                    | GATA3_up        | + | AAGCTTGTAGTACAGCCCAC   | AGG        | 77                     | 67                      |
|                                                                          | GATA3_down      | - | GTTAGTTGTACACGGTACTT   | CGG        | 65                     | 86                      |

On/Off Target Scores are based on IDT's web design tool:

[https://eu.idtdna.com/site/order/designtool/index/CRISPR\\_PREDESIGN](https://eu.idtdna.com/site/order/designtool/index/CRISPR_PREDESIGN)

PAM = protospacer adjacent motif
